# Supplementary material for: The role of cochlear place coding in the perception of frequency modulation
Source: eLife. 2020 Sep 30;9:e58468. doi: 10.7554/eLife.58468 (PMC7556860; doi:10.7554/eLife.58468)
Supplement: Figure 2—figure supplement 1—source data 1. [file elife-58468-fig2-figsupp1-data1.xlsx]

## Sheet: Sheet1
TonePipFrequency	AbsoluteThreshold	MaskedThreshold
800	34.333	39
860	34.667	45.333
920	35.333	54.1665
980	35	61.6665
1020	37.333	62
1080	37.333	58.5
1140	37.667	58.3335
1200	37.667	53.8335
