# Supplementary material for: The role of cochlear place coding in the perception of frequency modulation
Source: eLife. 2020 Sep 30;9:e58468. doi: 10.7554/eLife.58468 (PMC7556860; doi:10.7554/eLife.58468)
Supplement: Figure 2—source data 1. — Rows are individual subjects. [file elife-58468-fig2-data1.xlsx]

## Sheet: Sheet1
AbsoluteThreshold	LowSlope	HighSlope
37.7777	48.8563	-23.4287
31.3337	78.5949	-31.4845
4.1111	92.9132	-43.8601
14.333	86.3793	-23.3623
50.7777	48.0123	-7.0942
31.1113	49.672	-30.8543
3.6667	103.55	-59.0634
-0.666667	128.023	-47.4421
42.3333	57.9821	-21.7965
5.8889	70.9104	-84.7346
40.7777	51.7009	-11.5515
66.2223	34.4736	0.0861843
25.3333	55.0595	-17.57
32.7777	62.2989	-34.8441
42.6663	-24.0184	-22.7218
62.2223	8.46807	-16.6908
26.2223	34.4328	-53.404
35.2223	0.0572899	-36.4354
57.6667	-15.6589	-10.5019
41.7777	49.89	-30.5836
24.222	53.4465	-17.0937
55.4443	15.6799	-19.9473
34.4443	85.3237	4.1286
34.111	25.24	-10.9289
27.5553	-13.079	-31.8002
44.6667	30.0544	-14.3853
20.4447	106.606	-26.8119
3	90.7611	-92.7164
29.778	54.591	-4.28349
30.889	56.0009	-30.3107
7.11113	92.4842	-86.4839
32.6667	38.6561	-32.2611
36.889	79.0833	-17.0245
28.778	64.4457	-40.0734
47.2223	10.3777	-7.06801
11.2223	100.671	-9.80137
4.88887	102.624	-67.5876
52.111	-1.07566	-12.0279
68.4447	37.3827	3.88079
38.3333	-1.77704	-37.984
32.5557	74.0773	-9.51115
46.2223	38.0892	-38.1885
52.5557	28.9261	28.2759
47.2223	19.5028	-10.932
66.3337	60.5741	-15.5958
50.778	38.953	11.9391
29.3333	66.418	-48.9808
42.5557	50.9763	-10.7022
35.3333	82.1373	-14.8103
44.2223	41.8776	-23.0425
59.778	2.61661	-4.01323
49.111	16.4318	-5.9661
45.778	32.2345	9.24569
43.6667	67.8383	2.96371
49.6667	44.3121	7.51943
