# Supplementary material for: The role of cochlear place coding in the perception of frequency modulation
Source: eLife. 2020 Sep 30;9:e58468. doi: 10.7554/eLife.58468 (PMC7556860; doi:10.7554/eLife.58468)
Supplement: Figure 3—source data 1. — Rows are individual subjects. Slow = 1 Hz modulation rate; Fast = 20 Hz modulation rate. [file elife-58468-fig3-data1.xlsx]

## Sheet: Sheet1
SlowFM	FastFM	SlowAM	FastAM
5.42697	6.05197	-9.41777	-23.8487
0.801967	-0.281367	-17.849	-26.0153
-1.07303	2.30197	-16.96	-23.96
-0.698033	3.2603	-19.182	-22.0153
6.84363	5.09363	-18.1267	-26.7933
1.30197	1.80197	-18.6823	-23.071
-0.656367	-0.406367	-22.46	-25.4043
1.67697	3.55197	-12.1823	-18.849
0.551967	-0.156367	-21.738	-29.571
0.343633	-0.2397	-15.8487	-23.46
2.30197	2.55197	-16.349	-21.682
1.8853	1.59363	-18.9047	-28.0153
-2.03137	0.551967	-21.571	-28.2377
-0.0730334	2.80197	-8.08443	-16.571
6.71863	7.0103	-17.1267	-23.0157
4.17697	4.55197	-17.2933	-26.4043
-0.823033	1.1353	-18.071	-23.238
6.05197	7.0103	-10.0712	-26.4043
5.09363	1.30197	-23.6823	-32.849
0.7603	3.3853	-15.5157	-24.1823
0.7603	2.2603	-13.0287	-23.1267
4.80197	7.21863	-20.46	-21.1267
-2.03137	-1.69803	-23.1267	-29.738
1.92697	2.5103	-20.5713	-29.5713
-0.2397	-1.44803	-14.3067	-26.849
3.05197	2.46863	-17.6267	-26.2377
-1.2397	0.0519666	-17.849	-27.182
-1.57303	0.8853	-15.238	-19.738
-0.406367	1.92697	-21.1267	-26.9043
-1.40637	-1.07303	-19.0713	-29.1823
-2.2397	1.0103	-21.2933	-23.071
-0.698033	3.5103	-14.0711	-26.418
1.30197	1.96863	-18.7933	-29.0157
-1.6147	1.5103	-19.5713	-23.8063
7.21863	7.55197	-13.1823	-17.571
0.1353	-0.0313667	-7.4733	-19.8487
0.343633	2.3853	-16.849	-20.1267
5.80197	6.46863	-20.1267	-24.8487
9.6353	8.5103	-9.9599	-16.2377
8.7603	6.8853	-17.6267	-26.3487
0.1353	1.5103	-14.7933	-23.4047
4.17697	6.6353	-13.738	-22.2933
4.80197	3.30197	-10.0291	-21.46
2.5103	1.5103	-19.6267	-27.571
5.1353	4.92697	-18.349	-24.738
3.92697	1.34363	-23.1267	-26.7933
-2.2397	-1.44803	-21.2933	-24.5157
0.0103	-0.3647	-16.4047	-25.1822
-2.7397	-1.32303	-16.2378	-25.5156
4.09363	4.09363	-12.6268	-27.2933
7.5103	5.8853	-18.6823	-28.2933
4.21863	0.551967	-25.6823	-33.571
5.46863	6.8853	-15.2933	-26.96
6.92697	4.30197	-16.96	-27.2377
4.0103	4.3853	-15.0153	-25.6823
