# Supplementary material for: The role of cochlear place coding in the perception of frequency modulation
Source: eLife. 2020 Sep 30;9:e58468. doi: 10.7554/eLife.58468 (PMC7556860; doi:10.7554/eLife.58468)
Supplement: Figure 4—figure supplement 1—source data 2. — Slow = 1 Hz modulation rate; Fast = 20 Hz modulation rate. [file elife-58468-fig4-figsupp1-data2.xlsx]

## Sheet: Sheet1
SlowFM	FastFM	Low Slope	High Slope
5.42697	6.05197	48.8563	-23.4287
0.801967	-0.281367	78.5949	-31.4845
-1.07303	2.30197	92.9132	-43.8601
-0.698033	3.2603	86.3793	-23.3623
6.84363	5.09363	48.0123	-7.0942
1.30197	1.80197	49.672	-30.8543
-0.656367	-0.406367	103.55	-59.0634
1.67697	3.55197	128.023	-47.4421
0.551967	-0.156367	57.9821	-21.7965
0.343633	-0.2397	70.9104	-84.7346
2.30197	2.55197	51.7009	-11.5515
1.8853	1.59363	34.4736	0.0861843
-2.03137	0.551967	55.0595	-17.57
-0.0730334	2.80197	62.2989	-34.8441
6.71863	7.0103	-24.0184	-22.7218
4.17697	4.55197	8.46807	-16.6908
-0.823033	1.1353	34.4328	-53.404
6.05197	7.0103	0.0572899	-36.4354
5.09363	1.30197	-15.6589	-10.5019
0.7603	3.3853	49.89	-30.5836
0.7603	2.2603	53.4465	-17.0937
4.80197	7.21863	15.6799	-19.9473
-2.03137	-1.69803	85.3237	4.1286
1.92697	2.5103	25.24	-10.9289
-0.2397	-1.44803	-13.079	-31.8002
3.05197	2.46863	30.0544	-14.3853
-1.2397	0.0519666	106.606	-26.8119
-1.57303	0.8853	90.7611	-92.7164
-0.406367	1.92697	54.591	-4.28349
-1.40637	-1.07303	56.0009	-30.3107
-2.2397	1.0103	92.4842	-86.4839
-0.698033	3.5103	38.6561	-32.2611
1.30197	1.96863	79.0833	-17.0245
-1.6147	1.5103	64.4457	-40.0734
7.21863	7.55197	10.3777	-7.06801
0.1353	-0.0313667	100.671	-9.80137
0.343633	2.3853	102.624	-67.5876
5.80197	6.46863	-1.07566	-12.0279
9.6353	8.5103	37.3827	3.88079
8.7603	6.8853	-1.77704	-37.984
0.1353	1.5103	74.0773	-9.51115
4.17697	6.6353	38.0892	-38.1885
4.80197	3.30197	28.9261	28.2759
2.5103	1.5103	19.5028	-10.932
5.1353	4.92697	60.5741	-15.5958
3.92697	1.34363	38.953	11.9391
-2.2397	-1.44803	66.418	-48.9808
0.0103	-0.3647	50.9763	-10.7022
-2.7397	-1.32303	82.1373	-14.8103
4.09363	4.09363	41.8776	-23.0425
15.1353	17.552	-17.9836	-16.5979
7.5103	5.8853	2.61661	-4.01323
4.21863	0.551967	16.4318	-5.9661
5.46863	6.8853	32.2345	9.24569
6.92697	4.30197	67.8383	2.96371
4.0103	4.3853	44.3121	7.51943
