# Supplementary material for: The role of cochlear place coding in the perception of frequency modulation
Source: eLife. 2020 Sep 30;9:e58468. doi: 10.7554/eLife.58468 (PMC7556860; doi:10.7554/eLife.58468)
Supplement: Figure 5—figure supplement 1—source data 1. — Slow = 1 Hz modulation rate; Fast = 20 Hz modulation rate. [file elife-58468-fig5-figsupp1-data1.xlsx]

## Sheet: FigS5A
LowSlopeResiduals	SlowFMResiduals
-2.0026	0.5037
22.3373	-0.935
1.1612	0.825
8.2449	0.1903
18.0978	2.8794
-6.0579	0.0402
11.9609	2.2953
30.2656	3.7327
17.3527	-1.6789
-17.6267	2.2333
9.039	-0.3856
25.3819	-3.8214
-7.6082	-1.891
8.8088	-2.8517
-64.0697	3.9295
-5.8423	-1.1807
-27.1447	-1.2682
-50.0173	3.2788
-35.4463	1.3489
8.8478	-2.0365
-10.7782	-0.0519
-7.0275	0.9537
35.2483	-2.6539
-25.382	0.9863
-72.567	-1.1889
-6.7314	0.324
38.0403	-0.69
-0.8373	0.9326
-1.5128	-0.6119
1.3458	-2.0199
6.7998	0.6831
-13.7174	-2.1919
32.4945	-0.0701
7.2445	-1.7896
-22.8832	3.6677
19.8626	0.5745
13.9535	2.9837
-27.5365	2.6182
26.4165	0.5214
-48.3359	6.2714
20.9309	-1.5158
3.0841	0.6489
2.2018	-0.0482
-13.6466	-0.1941
52.6357	-0.2351
10.2558	1.0912
7.8957	-3.1306
11.7789	-2.4367
31.8329	-4.919
-11.8528	-0.2937
-20.4425	-0.5864
6.9146	-1.8742
-20.3566	-1.0998
11.0695	-0.3707
-13.4699	-1.9598
-32.284	-0.1539
-0.0707	-1.1742
-21.9557	-0.9374
51.1001	-1.4113
24.5529	-3.6393
-0.0115	-1.0814
-15.3903	2.4487
-14.6819	1.828
-3.6825	2.056
29.6519	4.2134
14.1615	0.3187

## Sheet: FigS5B
HighSlopeResiduals	SlowFMResiduals
1.5017	0.5037
0.7341	-0.935
15.8918	0.825
27.3109	0.1903
2.1062	2.8794
0.0992	0.0402
5.1257	2.2953
11.2797	3.7327
-0.5654	-1.6789
-30.7661	2.2333
5.2646	-0.3856
-8.067	-3.8214
20.9122	-1.891
-17.7496	-2.8517
-7.4519	3.9295
-22.4532	-1.1807
-19.5828	-1.2682
-20.3491	3.2788
-5.6861	1.3489
-16.6928	-2.0365
13.2726	-0.0519
-16.3576	0.9537
32.6874	-2.6539
15.4406	0.9863
-4.6536	-1.1889
-2.6072	0.324
11.1917	-0.69
-38.507	0.9326
26.7518	-0.6119
-2.7504	-2.0199
-31.4257	0.6831
-12.077	-2.1919
3.2104	-0.0701
-10.3531	-1.7896
-3.5383	3.6677
26.857	0.5745
-14.9335	2.9837
-7.0843	2.6182
-2.4459	0.5214
-15.0557	6.2714
13.472	-1.5158
-31.6749	0.6489
23.9137	-0.0482
-0.4904	-0.1941
-27.4922	-0.2351
23.1356	1.0912
-11.8168	-3.1306
0.8998	-2.4367
9.2068	-4.919
10.4285	-0.2937
-28.236	-0.5864
12.5511	-1.8742
6.4209	-1.0998
34.7962	-0.3707
-9.1021	-1.9598
-4.7786	-0.1539
17.0496	-1.1742
-13.0935	-0.9374
22.8504	-1.4113
-5.084	-3.6393
-2.9477	-1.0814
-4.1353	2.4487
10.5742	1.828
18.964	2.056
15.3285	4.2134
10.776	0.3187

## Sheet: FigS5C
LowSlopeResiduals	FastFMResiduals
-1.8441	1.975
22.4828	-2.3166
1.2	2.2426
7.8066	1.532
18.2239	1.6398
-6.4171	-1.0824
11.9756	0.2136
29.7468	2.2382
17.8058	-1.7434
-17.6301	-0.4289
8.5032	-1.6548
25.5628	-2.8007
-7.2479	0.2071
7.8988	-2.4491
-64.4433	3.1215
-5.8159	-0.0065
-27.4192	-1.071
-49.4809	5.0797
-34.667	-0.4499
8.7381	0.0615
-10.8251	0.259
-7.9384	1.5086
35.7126	-2.2563
-24.8239	1.9267
-72.1072	-2.3649
-6.6337	-0.3106
38.4354	-0.0317
-1.3843	-0.1783
-1.3742	0.8501
1.9319	-1.4196
6.4725	0.8005
-13.3495	2.041
33.0273	1.0273
6.9709	-0.5132
-23.9681	1.502
19.6368	-1.77
13.3801	1.367
-27.8238	2.5713
25.1475	-1.3739
-48.1748	4.4135
20.7918	-1.1878
2.728	2.2691
1.8434	-1.9462
-13.4477	-0.9935
52.3202	-0.4086
10.1481	-1.875
7.6576	-3.779
11.7787	-3.2184
31.9453	-3.7411
-11.1196	0.5075
-20.0542	-2.2885
7.0885	-0.4561
-20.685	0.6809
10.8297	-0.5742
-13.0012	-0.1341
-32.7991	0.0008
0.0042	-2.3258
-22.8303	-0.6481
51.9336	0.8389
25.1774	-2.8218
0.5001	0.7132
-15.1117	2.111
-13.8243	-0.1536
-3.3687	4.1423
29.9452	1.9654
14.2588	0.9665

## Sheet: FigS5D
HighSlopeResiduals	FastFMResiduals
7.4985	1.975
-1.305	-2.3166
14.9685	2.2426
25.029	1.532
0.2417	1.6398
-1.5396	-1.0824
-1.4815	0.2136
16.7599	2.2382
-6.9303	-1.7434
-30.0294	-0.4289
6.7358	-1.6548
-10.5812	-2.8007
14.9206	0.2071
-6.6692	-2.4491
-7.0873	3.1215
-22.9108	-0.0065
-20.5212	-1.071
-14.184	5.0797
-14.4458	-0.4499
-15.0166	0.0615
17.3908	0.259
-18.2887	1.5086
25.0927	-2.2563
10.4159	1.9267
-2.7656	-2.3649
-3.4487	-0.3106
9.3856	-0.0317
-35.7634	-0.1783
21.9969	0.8501
-6.1283	-1.4196
-35.516	0.8005
-9.5597	2.041
0.3528	1.0273
-12.5167	-0.5132
2.8895	1.502
37.524	-1.77
-13.7135	1.367
-9.646	2.5713
5.7943	-1.3739
-16.6378	4.4135
15.9426	-1.1878
-27.4614	2.2691
32.2192	-1.9462
-3.5941	-0.9935
-28.0249	-0.4086
16.735	-1.875
-16.7455	-3.779
1.7186	-3.2184
9.3	-3.7411
5.066	0.5075
-30.2128	-2.2885
12.6022	-0.4561
13.07	0.6809
41.9722	-0.5742
-8.0201	-0.1341
2.8438	0.0008
18.5375	-2.3258
-14.8306	-0.6481
25.3972	0.8389
-6.1465	-2.8218
-0.9177	0.7132
-6.8166	2.111
-0.6187	-0.1536
20.0274	4.1423
14.793	1.9654
12.8542	0.9665
