# Supplementary material for: The role of cochlear place coding in the perception of frequency modulation
Source: eLife. 2020 Sep 30;9:e58468. doi: 10.7554/eLife.58468 (PMC7556860; doi:10.7554/eLife.58468)
Supplement: Figure 5—figure supplement 1—source data 2. — Slow = 1 Hz modulation rate; Fast = 20 Hz modulation rate. [file elife-58468-fig5-figsupp1-data2.xlsx]

## Sheet: FigS3A
LowSlopeResiduals	SlowFMResiduals
-1.6956	-1.0363
21.5146	-1.6207
-2.106	0.2431
5.6926	-0.3444
19.2953	2.3746
-6.8356	-0.4276
8.0377	1.9398
27.2766	3.2006
17.3062	-2.0523
-20.3659	1.8708
9.6104	-0.785
28.0819	-4.2056
-9.2077	-2.1642
9.7094	-3.37
-63.3971	3.5655
-3.2918	-1.5591
-28.1784	-1.583
-49.1167	2.8214
-34.1296	1.1459
9.7032	-2.3627
-11.2932	-0.398
-5.4678	0.7351
34.4488	-2.7696
-25.8751	0.8281
-72.8609	-1.4397
-5.7928	0.1255
36.6154	-0.8414
-3.6036	0.7613
-2.4562	-0.7059
0.7994	-2.1302
3.6862	0.674
-13.3936	-2.3477
32.6091	-0.1429
6.4742	-1.835
-21.0282	3.4834
18.9916	0.3432
11.2417	2.935
-26.1106	2.565
29.5217	-1.1624
-48.337	5.7049
21	-1.83
4.6664	0.3575
4.9144	-0.3805
-12.6822	-0.3123
55.6524	-0.3613
11.0173	0.9312
6.4722	-3.6992
12.7686	-2.5453
31.7833	-5.4384
0.5759	-2.4816
-28.4629	6.3502
-13.3828	1.9559
-14.4958	1.6264
-2.4382	1.6889
30.569	3.99
15.9696	0.1152

## Sheet: FigS3B
HighSlopeResiduals	SlowFMResiduals
4.5007	-1.0363
0.3842	-1.6207
13.844	0.2431
25.0768	-0.3444
3.6383	2.3746
-0.2932	-0.4276
0.5933	1.9398
11.4084	3.2006
-1.4037	-2.0523
-31.6644	1.8708
7.0584	-0.785
-5.3753	-4.2056
18.8775	-2.1642
-12.5552	-3.37
-5.834	3.5655
-19.255	-1.5591
-19.7903	-1.583
-15.866	2.8214
-5.8896	1.1459
-14.2386	-2.3627
15.4674	-0.398
-15.0993	0.7351
30.9271	-2.7696
14.9063	0.8281
-2.6574	-1.4397
-0.7642	0.1255
10.9085	-0.8414
-38.9751	0.7613
25.6732	-0.7059
-2.6895	-2.1302
-34.3949	0.674
-9.3351	-2.3477
4.0073	-0.1429
-10.6137	-1.835
0.8752	3.4834
31.0455	0.3432
-15.8479	2.935
-5.6281	2.565
2.6554	-1.1624
-14.4574	5.7049
15.5272	-1.83
-27.8409	0.3575
30.1574	-0.3805
0.6807	-0.3123
-24.0125	-0.3613
22.707	0.9312
-13.9184	-3.6992
3.3684	-2.5453
10.36	-5.4384
-0.8026	-2.4816
-15.5389	6.3502
-2.0911	1.9559
8.5869	1.6264
21.8037	1.6889
17.386	3.99
14.4073	0.1152

## Sheet: FigS3C
LowSlopeResiduals	FastFMResiduals
-1.1866	0.7078
22.5853	-2.7514
-1.4417	1.9359
5.6739	1.0287
20.0125	1.2999
-6.982	-1.5447
9.4842	0.13
25.6994	1.7139
19.3437	-1.7701
-20.348	-0.5668
8.4427	-2.1778
28.8188	-3.0516
-7.4488	0.2824
6.2206	-3.266
-64.115	2.7025
-3.2095	-0.3177
-28.4609	-1.3432
-49.1879	4.98
-31.3157	-0.2123
9.1643	-0.2079
-12.0895	0.0438
-6.9194	0.9523
36.4802	-2.0117
-24.1163	2.164
-72.4576	-2.2665
-5.6426	-0.3681
37.5227	0.1674
-5.1353	-0.3843
-1.5467	0.9708
2.2539	-1.1233
3.6412	0.8589
-13.4018	2.1663
33.8028	1.3129
6.1098	-0.5409
-24.3815	0.8877
16.5573	-1.9483
9.8057	1.2623
-26.5113	2.4586
27.1114	-3.518
-47.4898	4.0707
20.2827	-1.4339
3.1509	1.8959
2.6373	-2.396
-12.0246	-0.9302
54.84	-0.6544
11.7907	-1.9837
7.2876	-4.2591
12.3366	-3.2382
32.1847	-4.0606
2.279	-0.2705
-31.2778	5.7563
-12.2912	1.8256
-11.0471	0.1582
-2.0803	4.0152
31.0401	1.9743
15.549	0.8754

## Sheet: FigS3D
HighSlopeResiduals	FastFMResiduals
4.686	0.7078
-2.5576	-2.7514
11.9355	1.9359
24.0182	1.0287
1.7318	1.2999
-0.6868	-1.5447
-4.575	0.13
15.8799	1.7139
-7.2578	-1.7701
-31.5648	-0.5668
9.7822	-2.1778
-7.3111	-3.0516
13.6308	0.2824
-2.329	-3.266
-4.2707	2.7025
-19.2882	-0.3177
-19.5623	-1.3432
-13.479	4.98
-13.7177	-0.2123
-12.4805	-0.2079
18.4274	0.0438
-12.8184	0.9523
24.8372	-2.0117
10.2031	2.164
-2.5389	-2.2665
-1.0105	-0.3681
8.8135	0.1674
-35.1897	-0.3843
22.6211	0.9708
-6.2181	-1.1233
-35.5836	0.8589
-8.1108	2.1663
1.2223	1.3129
-10.3911	-0.5409
9.6051	0.8877
39.3633	-1.9483
-12.6527	1.2623
-5.3136	2.4586
8.9774	-3.518
-16.6533	4.0707
17.8374	-1.4339
-23.3316	1.8959
37.5418	-2.396
-1.2025	-0.9302
-22.18	-0.6544
19.3877	-1.9837
-17.3615	-4.2591
4.8512	-3.2382
9.6033	-4.0606
-4.0177	-0.2705
-9.7354	5.7563
-4.8856	1.8256
-1.3372	0.1582
21.7212	4.0152
16.6449	1.9743
16.2902	0.8754
