# Supplementary material for: The role of cochlear place coding in the perception of frequency modulation
Source: eLife. 2020 Sep 30;9:e58468. doi: 10.7554/eLife.58468 (PMC7556860; doi:10.7554/eLife.58468)
Supplement: Figure 5—source data 1. — Rows are individual subjects. Slow = 1 Hz modulation rate; Fast = 20 Hz modulation rate. [file elife-58468-fig5-data1.xlsx]

## Sheet: Fig5A
LowSlopeResiduals	SlowFMResiduals
-7.0154	0.1505
19.5547	-1.1835
-2.4713	0.3246
4.9318	-0.1747
17.4368	2.7893
-7.8497	-0.2013
8.1656	1.9113
27.835	3.076
15.9927	-1.7593
-19.6447	1.7099
8.81	-0.6064
26.1348	-3.7712
-9.4005	-2.1211
9.5318	-3.3303
-64.1843	3.7412
-4.8901	-1.2025
-28.2254	-1.5726
-49.3111	2.8648
-35.4177	1.4333
9.2998	-2.2727
-10.8727	-0.4919
-6.4012	0.9434
34.4935	-2.7795
-25.7445	0.799
-72.2516	-1.5756
-5.928	0.1557
37.5766	-1.0559
-1.809	0.3609
-1.9221	-0.8251
1.4357	-2.2722
5.4437	0.2819
-12.501	-2.5468
33.2293	-0.2813
7.4412	-2.0507
-20.7153	3.4135
21.0313	-0.1118
13.3712	2.4599
-26.1058	2.5639
22.3286	0.4423
-49.9711	6.0695
21.0725	-1.8462
4.4524	0.4052
4.6707	-0.3262
-12.7483	-0.2975
54.9764	-0.2105
10.2473	1.103
4.7688	-3.3192
13.2662	-2.6564
30.6312	-5.1814
-4.6679	-1.3117
-15.5785	2.4458
-15.6741	1.8893
-3.1587	1.8497
30.4248	4.0222
15.9053	0.1295

## Sheet: Fig5B
HighSlopeResiduals	SlowFMResiduals
1.5965	0.1505
-0.6858	-1.1835
13.6446	0.3246
24.6615	-0.1747
2.6237	2.7893
-0.8469	-0.2013
0.6632	1.9113
11.7133	3.076
-2.1208	-1.7593
-31.2707	1.7099
6.6214	-0.6064
-6.4383	-3.7712
18.7722	-2.1211
-12.6522	-3.3303
-6.2637	3.7412
-20.1275	-1.2025
-19.816	-1.5726
-15.9721	2.8648
-6.5929	1.4333
-14.4588	-2.2727
15.697	-0.4919
-15.6089	0.9434
30.9515	-2.7795
14.9777	0.799
-2.3248	-1.5756
-0.838	0.1557
11.4333	-1.0559
-37.9954	0.3609
25.9648	-0.8251
-2.3421	-2.2722
-33.4354	0.2819
-8.8478	-2.5468
4.3459	-0.2813
-10.0858	-2.0507
1.0461	3.4135
32.159	-0.1118
-14.6854	2.4599
-5.6254	2.5639
-1.2716	0.4423
-15.3495	6.0695
15.5668	-1.8462
-27.9578	0.4052
30.0243	-0.3262
0.6446	-0.2975
-24.3815	-0.2105
22.2867	1.103
-14.8483	-3.3192
3.64	-2.6564
9.731	-5.1814
-3.6654	-1.3117
-3.2898	2.4458
7.9436	1.8893
21.4104	1.8497
17.3073	4.0222
14.3723	0.1295

## Sheet: Fig5C
LowSlopeResiduals	FastFMResiduals
-6.6851	1.7197
21.5041	-2.5524
-1.0784	1.869
4.3682	1.269
18.6283	1.5546
-8.6703	-1.234
11.119	-0.1709
24.4347	1.9467
20.2174	-1.9309
-19.3827	-0.7444
5.818	-1.6948
27.3567	-2.7825
-5.5814	-0.0612
1.7649	-2.446
-66.1296	3.0733
-5.0366	0.0186
-29.0434	-1.236
-48.8593	4.9195
-29.3773	-0.569
8.062	-0.005
-12.3437	0.0906
-10.4391	1.6
38.9605	-2.4682
-21.6825	1.716
-70.8174	-2.5684
-5.57	-0.3815
39.9908	-0.2868
-4.9728	-0.4142
0.1055	0.6667
5.0335	-1.6348
5.376	0.5396
-11.9386	1.897
36.2394	0.8645
6.6162	-0.6341
-28.3936	1.626
16.4984	-1.9375
10.4078	1.1515
-27.2512	2.5948
15.007	-1.2904
-48.4091	4.2399
19.565	-1.3019
1.0651	2.2797
-0.2158	-1.8709
-11.2954	-1.0644
52.847	-0.2877
11.4535	-1.9216
5.8392	-3.9926
12.497	-3.2678
31.3645	-3.9097
-1.6457	0.4518
-13.5774	2.0623
-8.2723	-0.3525
-2.2513	4.0466
31.6253	1.8666
15.1548	0.9479

## Sheet: Fig5D
HighSlopeResiduals	FastFMResiduals
2.9745	1.7197
-2.8941	-2.5524
12.0486	1.869
23.6118	1.269
1.301	1.5546
-1.2123	-1.234
-4.0662	-0.1709
15.4863	1.9467
-6.9858	-1.9309
-31.2643	-0.7444
8.9652	-1.6948
-7.7662	-2.7825
14.212	-0.0612
-3.7158	-2.446
-4.8978	3.0733
-19.8569	0.0186
-19.7436	-1.236
-13.3767	4.9195
-13.1144	-0.569
-12.8236	-0.005
18.3483	0.0906
-13.9139	1.6
25.6092	-2.4682
10.9607	1.716
-2.0284	-2.5684
-0.9879	-0.3815
9.5817	-0.2868
-35.1391	-0.4142
23.1354	0.6667
-5.3529	-1.6348
-35.0436	0.5396
-7.6554	1.897
1.9807	0.8645
-10.2335	-0.6341
8.3563	1.626
39.345	-1.9375
-12.4653	1.1515
-5.5439	2.5948
5.2099	-1.2904
-16.9395	4.2399
17.6141	-1.3019
-23.9808	2.2797
36.6538	-1.8709
-0.9755	-1.0644
-22.8003	-0.2877
19.2828	-1.9216
-17.8123	-3.9926
4.9012	-3.2678
9.348	-3.9097
-5.2393	0.4518
-5.2859	2.0623
-0.4736	-0.3525
21.668	4.0466
16.8271	1.8666
16.1675	0.9479
