# Supplementary material for: The role of cochlear place coding in the perception of frequency modulation
Source: eLife. 2020 Sep 30;9:e58468. doi: 10.7554/eLife.58468 (PMC7556860; doi:10.7554/eLife.58468)
Supplement: Figure 6—source data 1. — Rows are individual subjects. Nrw = 2/3 octave frequency separation; Wide = 4/3 octave frequency separation; Slow = 2 Hz modulation rate; Fast = 20 Hz modulation rate; In = in phase; Out = out of phase. The number in each column label (e.g., 500) corresponds to the center frequency. [file elife-58468-fig6-data1.xlsx]

## Sheet: Fig6D-E
NrwSlow_500	NrwFast_500	NrwSlow_1500	NrwFast_1500	NrwSlow_7000	NrwFast_7000	WideSlow_500	WideFast_500	WideSlow_1500	WideFast_1500	WideSlow_7000	WideFast_7000
-19.75	-10.875	-20.75	-14.375	-12.125	-8	-20.1667	-5.79167	-22.3333	-11.4167	-12.2083	-7.625
-11.5417	-7.16667	-8.83333	-8.79167	-4.70833	-6.58333	-12.9583	-4.33333	-4.375	-7.66667	-2.25	-4.125
-8.95833	-11.5833	-14.875	-12.875	-8.5	-4.83333	-5.16667	-5.125	-16.2917	-11.125	-7.41667	-2.5
-7.29167	-15.7083	-12.1667	-15.5	-2.25	-11.1667	-2.58333	-11.1667	-10	-11.7083	-1.125	-10.125
-11.2083	-9.58333	-15.5417	-7.5	-6.83333	-3.95833	-4.875	-6.45833	-17.5417	-5.5	-5	-3.95833
-7.5	-5.79167	-10.1667	-11.8333	-5.125	-7.75	-3.375	-3.58333	-10.6667	-9.45833	-6.375	-6.70833
-2.875	-2.66667	-6.83333	-6	-1.875	-4.83333	-3.91667	-1.75	-8.70833	-5.20833	-1.5	-3.66667
-16.625	-5.91667	-16.0833	-12.0833	-8.66667	-7.91667	-10.9583	-2.5	-16.9167	-9.83333	-7.375	-6.625
-14	-8.375	-13.8333	-5.33333	-2.375	-7.16667	-10.2917	-2.79167	-14.3333	-5.95833	-4.79167	-2
-8.08333	-6.58333	-17.0833	-14.6667	-7.70833	-8.41667	-3.625	-1.04167	-17.7083	-11.9583	-1.41667	-1.91667
-18.5833	-2.25	-13.2917	-3.20833	-4.70833	-3.29167	-8.16667	-1.5	-14.0833	-1.45833	-3.70833	-1.95833
-9.45833	-4.125	-12.0833	-8.83333	-5.25	-5.625	-8.66667	-1.83333	-13.75	-8.625	-4.04167	-3.79167
-11.375	-5.54167	-11.8333	-5.16667	-1.75	-5.83333	-2.95833	-1.66667	-8.04167	-5.16667	-1.625	-1.83333
-7.70833	-1.25	-14.2917	-6.41667	-5.54167	-4.66667	-2.08333	-0.958333	-10.9583	-2.83333	-4.16667	-1.58333
-5.95833	-10.0833	-9.04167	-12.5	-7.83333	-13.1667	-3.25	-9.45833	-8.29167	-11.2917	-5.08333	-8.83333
-20.8333	-10.4583	-17.8333	-7.25	-12.2083	-5.29167	-18.5833	-7.625	-16.5417	-8.70833	-5.41667	-4.25
-7.33333	-4	-9.83333	-2.33333	-3.375	-2.25	-4.75	-2.125	-6.16667	-2.16667	-2.41667	-1.79167
-21.5	-1.83333	-9.83333	-1.29167	-5.25	-2.16667	-20.625	-1.45833	-13.5833	-1.04167	-1.70833	-1.08333
-5.79167	-9.125	-12.7917	-5.45833	-2.08333	-2.16667	-7.79167	-6.33333	-11.2083	-4.33333	-1.125	-1.25
-18.2917	-12.125	-18.875	-15.4583	-8.16667	-12.1667	-16.1667	-6	-19.7083	-13.2917	-6.91667	-12.9167

## Sheet: Fig6F-G
Slow500_In	Fast500_In	Slow1500_In	Fast1500_In	Slow7000_In	Fast7000_In	Slow500_Out	Fast500_Out	Slow1500_Out	Fast1500_Out	Slow7000_Out	Fast7000_Out
1.14045	0.701238	0.909828	0.525884	1.04489	0.931737	1.32171	0.622131	1.43574	0.976244	0.998863	0.762029
1.43574	0.909828	0.721353	1.49641	1.32171	1.24153	1.46574	0.622131	1.32171	1.11609	1.77281	0.803346
1.81239	0.701238	1.46574	0.824262	1.77281	1.04489	2.39765	1.06832	2.32617	0.909828	1.62684	0.721353
1.16516	0.953873	1.46574	1.06832	0.782604	1.04489	1.37761	0.803346	1.85344	1.21568	0.321797	0.413481
1.81239	0.37662	1.77281	1.14045	1.69756	0.762029	1.5278	0.998863	1.34939	1.5278	1.19023	0.641717
1.19023	1.62684	1.21568	0.762029	1.19023	1.04489	1.40638	1.37761	1.14045	0.909828	0.953873	0.583311
2.0358	2.56243	1.59296	1.37761	2.19878	1.34939	2.08708	2.39765	2.65984	1.77281	1.94059	1.73457
2.0358	1.24153	0.803346	1.34939	1.29452	1.40638	3.28995	1.89611	1.73457	1.55997	1.02174	1.2678
1.40638	0.544925	1.06832	1.11609	0.976244	1.02174	2.65984	0.602664	2.26019	0.909828	0.824262	0.888135
0.866648	0.544925	1.19023	0.525884	1.16516	0.413481	1.49641	0.544925	1.69756	1.16516	0.866648	0.888135
1.77281	1.89611	1.69756	0.231448	1.66168	0.602664	2.90444	2.47584	1.46574	0.701238	0.931737	0.866648
0.84536	0.888135	0.888135	0.824262	1.69756	1.59296	1.81239	1.43574	1.66168	0.84536	2.19878	1.37761
0.866648	1.24153	1.11609	0.488081	0.824262	1.14045	1.85344	1.73457	1.40638	0.506937	1.21568	1.2678
1.06832	0.641717	1.59296	2.0358	1.34939	1.40638	1.85344	0.641717	1.66168	1.69756	1.21568	1.40638
0.824262	0.340014	1.11609	0.564066	0.602664	0.469312	0.931737	0.469312	1.09205	0.469312	0.267454	0.321797
0.998863	0.976244	0.622131	1.02174	1.02174	0.888135	2.14126	1.02174	1.59296	0.721353	1.46574	0.602664
1.16516	1.34939	1.34939	1.40638	2.32617	2.32617	1.59296	1.55997	0.866648	1.62684	1.19023	1.94059
0.469312	0.953873	0.803346	1.21568	0.953873	1.02174	2.19878	0.721353	1.24153	0.721353	0.998863	0.450624
1.2678	1.40638	0.866648	1.09205	1.69756	0.953873	2.0358	1.34939	1.59296	0.824262	0.488081	0.931737
0.564066	0.641717	0.544925	0.661426	0.741614	0.701238	0.953873	1.2678	0.564066	0.564066	0.661426	0.488081
